# Supplementary material for: Combined IL-2, agonistic CD3 and 4-1BB stimulation preserve clonotype hierarchy in propagated non-small cell lung cancer tumor-infiltrating lymphocytes
Source: PubMed Central journal article supplement — J Immunother Cancer. 2022 Feb 2;10(2):e003082. doi: 10.1136/jitc-2021-003082 (PMC8811607; doi:10.1136/jitc-2021-003082), 2022-02-02
Supplement: jitc-2021-003082supp002.pdf [file jitc-2021-003082supp002.pdf]

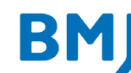

## BMJ Change of Authorship Form

Please complete this form to request any authorship change(s) to your manuscript. This form should be completed in full by the Corresponding Author, who is responsible for obtaining the approval of all authors before submission. Any personal data supplied in this form will be processed in accordance with [BMJ's Privacy Notice](#) for the purpose of recording the change(s) requested. Completed forms should be sent by email to the relevant Journal's Editorial Office.

| <b>PART A: Manuscript and basic information</b>                            |                                                                                                                                                         |
|----------------------------------------------------------------------------|---------------------------------------------------------------------------------------------------------------------------------------------------------|
| Please complete the fields below to enable us to identify your manuscript. |                                                                                                                                                         |
| <b>Journal name:</b>                                                       | Journal for ImmunoTherapy of Cancer                                                                                                                     |
| <b>Manuscript ID:</b>                                                      | JITC-2021-003082                                                                                                                                        |
| <b>Manuscript title:</b>                                                   | Combined IL-2, agonistic CD3 and 4-1BB stimulation preserve clonotype hierarchy in propagated non-small cell lung cancer tumor-infiltrating lymphocytes |
| <b>Named Corresponding Author:</b>                                         | Dr. Chantale Bernatchez                                                                                                                                 |
| <b>Revision no:</b>                                                        | 1                                                                                                                                                       |

| <b>PART B: Proposed authorship changes</b>                                                                                                                                                                                                                                                                                    |                                                                                                                                                                                                                                                                                                                                                                                                        |
|-------------------------------------------------------------------------------------------------------------------------------------------------------------------------------------------------------------------------------------------------------------------------------------------------------------------------------|--------------------------------------------------------------------------------------------------------------------------------------------------------------------------------------------------------------------------------------------------------------------------------------------------------------------------------------------------------------------------------------------------------|
| Please complete this section of the form to tell us about the changes you wish to implement to the authorship of your manuscript. To ensure the changes are compliant with BMJ's authorship requirements please refer to <a href="#">BMJ's authorship policy</a> and the <a href="#">ICMJE Recommendations</a> on authorship. |                                                                                                                                                                                                                                                                                                                                                                                                        |
| <b>1</b>                                                                                                                                                                                                                                                                                                                      | <b>Corresponding Author</b>                                                                                                                                                                                                                                                                                                                                                                            |
| 1.1                                                                                                                                                                                                                                                                                                                           | <p>Do you wish to change the named Corresponding Author*</p> <p>*The Corresponding Author is the point of contact and will be required to liaise with BMJ's Editorial Team in all matters relating to the publication of your manuscript.</p> <p><input checked="" type="checkbox"/> No change – Please proceed to question 2</p> <p><input type="checkbox"/> Yes – Please proceed to question 1.2</p> |
| 1.2                                                                                                                                                                                                                                                                                                                           | Please confirm the name of the proposed new corresponding author:                                                                                                                                                                                                                                                                                                                                      |
| <b>2</b>                                                                                                                                                                                                                                                                                                                      | <b>Named authors</b>                                                                                                                                                                                                                                                                                                                                                                                   |
| 2.1                                                                                                                                                                                                                                                                                                                           | <p>Do you wish to update the authorship <b>OR</b> the order of authors named for your manuscript?</p> <p><input type="checkbox"/> No change – Please proceed to question 3</p> <p><input checked="" type="checkbox"/> Yes – Please proceed to question 2.2</p>                                                                                                                                         |

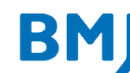

|          |                                                                                                                                                                        |                                                                                                                                                                                                                                                                                                                                                                                                                                                                                                                                       |
|----------|------------------------------------------------------------------------------------------------------------------------------------------------------------------------|---------------------------------------------------------------------------------------------------------------------------------------------------------------------------------------------------------------------------------------------------------------------------------------------------------------------------------------------------------------------------------------------------------------------------------------------------------------------------------------------------------------------------------------|
| 2.2      | Please confirm the proposed new authorship list in the list below. Authors should be listed in the order in which it is now proposed they are shown on the manuscript. |                                                                                                                                                                                                                                                                                                                                                                                                                                                                                                                                       |
|          | <b>Author Full Name</b>                                                                                                                                                | <b>Author Affiliation</b>                                                                                                                                                                                                                                                                                                                                                                                                                                                                                                             |
| 1        | Parin Shah                                                                                                                                                             | The University of Texas MDACC                                                                                                                                                                                                                                                                                                                                                                                                                                                                                                         |
| 2        | Marie-Andree Forget                                                                                                                                                    | The University of Texas MDACC                                                                                                                                                                                                                                                                                                                                                                                                                                                                                                         |
| 3        | Meredith L Frank                                                                                                                                                       | The University of Texas MDACC                                                                                                                                                                                                                                                                                                                                                                                                                                                                                                         |
| 4        | Peixin Jiang                                                                                                                                                           | The University of Texas MDACC                                                                                                                                                                                                                                                                                                                                                                                                                                                                                                         |
| 5        | Donastas Sakellariou-Thompson                                                                                                                                          | The University of Texas MDACC                                                                                                                                                                                                                                                                                                                                                                                                                                                                                                         |
| 6        | Lorenzo Federico                                                                                                                                                       | The University of Texas MDACC                                                                                                                                                                                                                                                                                                                                                                                                                                                                                                         |
| 7        | Roohussaba Khairullah                                                                                                                                                  | The University of Texas MDACC                                                                                                                                                                                                                                                                                                                                                                                                                                                                                                         |
| 8        | Chantal Alexia Neutzler                                                                                                                                                | The University of Texas MDACC                                                                                                                                                                                                                                                                                                                                                                                                                                                                                                         |
| 9        | Ignacio ivan Wistuba                                                                                                                                                   | The University of Texas MDACC                                                                                                                                                                                                                                                                                                                                                                                                                                                                                                         |
| 10       | Chi-Wan B Chow                                                                                                                                                         | The University of Texas MDACC                                                                                                                                                                                                                                                                                                                                                                                                                                                                                                         |
|          | <i>Where there are more than 10 authors please use the continuation sheet provided.</i>                                                                                |                                                                                                                                                                                                                                                                                                                                                                                                                                                                                                                                       |
| <b>3</b> | <b>Acknowledgements</b>                                                                                                                                                |                                                                                                                                                                                                                                                                                                                                                                                                                                                                                                                                       |
| 3.1      | Do you wish to update the acknowledgements?                                                                                                                            | <input type="checkbox"/> No change – Please proceed to question 4<br><input checked="" type="checkbox"/> Yes – Please proceed to question 3.2                                                                                                                                                                                                                                                                                                                                                                                         |
| 3.2      | Please confirm the required changes:                                                                                                                                   | PS was supported by the CPRIT Research Training Award (RP210028)<br>AR was further supported by CPRIT (RP210137)                                                                                                                                                                                                                                                                                                                                                                                                                      |
| <b>4</b> | <b>Author Contributions</b>                                                                                                                                            |                                                                                                                                                                                                                                                                                                                                                                                                                                                                                                                                       |
| 4.1      | Do you wish to update the contributions?                                                                                                                               | <input type="checkbox"/> No change – Please proceed to question 5<br><input checked="" type="checkbox"/> Yes – Please proceed to question 4.2                                                                                                                                                                                                                                                                                                                                                                                         |
| 4.2      | Please confirm the required changes:                                                                                                                                   | Conception and design: PS, MAF, MLF, DJM, AR, CB. Data acquisition: PS, MAF, MLF, PJ, DST LF, CWC, YL, JF, RK, CAN. Analysis and Interpretation of data: PS, MAF, MLF, PJ, DST, LF, DJM, CH, AR, CB. Writing and revision of the manuscript: PS, MAF, MLF, LF, PJ, DST, RK, CAN, SYL, CWC, YL, JF, MVN, KGM, AAV, TC, JL, JZ, BS, IW, DLG, JVH, CH, DJM, AR and CB. All authors have made material intellectual contributions to this work in accordance with the International Committee of Medical Journal Editors Recommendations. |



| 5                                                                                                                                 |                                                                                                                                                                                                                                                                                                                               | Competing Interests                                                                                                                             |
|-----------------------------------------------------------------------------------------------------------------------------------|-------------------------------------------------------------------------------------------------------------------------------------------------------------------------------------------------------------------------------------------------------------------------------------------------------------------------------|-------------------------------------------------------------------------------------------------------------------------------------------------|
| 5.1                                                                                                                               | Have any new authors been added to the list of named authors for your manuscript?                                                                                                                                                                                                                                             | <input type="checkbox"/> No change – Please proceed to question 5.3<br><input checked="" type="checkbox"/> Yes – Please proceed to question 5.2 |
| 5.2                                                                                                                               | Please confirm that each new author has completed the <a href="#">ICJME COI disclosure form</a> and a copy is/copies are available on request.                                                                                                                                                                                | <input checked="" type="checkbox"/> Yes, confirmed – Please proceed to question 5.3                                                             |
| 5.3                                                                                                                               | Do you need to update the competing interests listed for any existing author?                                                                                                                                                                                                                                                 | <input checked="" type="checkbox"/> No change – Please proceed to Part D<br><input type="checkbox"/> Yes – Please proceed to question 5.4       |
| 5.4                                                                                                                               | Please confirm any updated competing interests in the list below. For information and guidance please refer to <a href="#">BMJ's Policy on Competing Interests</a> . Please note that where no competing interests have been provided for any author, the default statement on the published article will be "None declared". |                                                                                                                                                 |
|                                                                                                                                   | Author Name                                                                                                                                                                                                                                                                                                                   | Competing Interest(s)                                                                                                                           |
|                                                                                                                                   | 1                                                                                                                                                                                                                                                                                                                             |                                                                                                                                                 |
|                                                                                                                                   | 2                                                                                                                                                                                                                                                                                                                             |                                                                                                                                                 |
|                                                                                                                                   | 3                                                                                                                                                                                                                                                                                                                             |                                                                                                                                                 |
|                                                                                                                                   | 4                                                                                                                                                                                                                                                                                                                             |                                                                                                                                                 |
|                                                                                                                                   | 5                                                                                                                                                                                                                                                                                                                             |                                                                                                                                                 |
| <i>Where there are more than 5 authors whose competing interests require updating please use the continuation sheet provided.</i> |                                                                                                                                                                                                                                                                                                                               |                                                                                                                                                 |

### PART C: Reason for change(s)

Please confirm why the proposed changes specified in Part B above are required.

Additional authors have been added because these individuals were involved in generating and analyzing extra data required to respond to reviewer's comments.

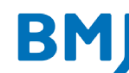

### PART D: Legal

1. This form is provided by BMJ Publishing Group Limited, (company registration number 03102371) whose registered office is at BMA House, Tavistock Square, London, WC1H 9JR, United Kingdom (**BMJ**).
2. Any personal data supplied in this form will be processed in accordance with [BMJ's Privacy Notice](#) for the purpose of recording the change(s) requested.
3. All change(s) requested must comply in full with [BMJ's authorship policy](#) and the [ICMJE Recommendations](#) on authorship. BMJ reserves the right to accept or refuse any change(s) requested in this form for any reason at BMJ's full discretion.
4. To the fullest extent permitted by law, in no circumstances shall BMJ be liable to the Corresponding Author or any other named author, or to any party, for any direct, indirect, incidental or consequential losses or expenses arising from the change(s) requested in this form.
5. Nothing in this Part D seeks to exclude liability for death or personal injury caused by BMJ's negligence or fraudulent misstatement. If BMJ has any liability in connection with the change(s) requested in this form, BMJ's aggregate liability shall not exceed £10,000.
6. The Corresponding Author shall indemnify BMJ against any claims, costs, expenses, proceeding, awards and demands against BMJ by the Corresponding Author, any other named author, or any other party arising as a result of the change(s) requested in this form and any breach of the warranties provided in Part E.

### PART E: Declaration

**IMPORTANT NOTICE:** Please ensure you have read Parts D and E carefully before signing this form. In signing this form you are confirming that the Declaration below is correct to the best of your knowledge and belief. If it later transpires that the statements below are incorrect or inaccurate, you could be liable for any resulting damage or losses sustained by BMJ.

#### DECLARATION

I confirm and warrant to BMJ that, to the best of my knowledge and belief:

- the information contained in this form is complete and accurate in all respects;
- a copy of this form has been provided to each existing author (including each author named in Part B), who have each approved the contents of this form (including any changes requested therein) prior to the submission of this form to BMJ;
- each author named in Parts B has consented to the storage and processing of their personal data contained in this form by BMJ in accordance with [BMJ's Privacy Notice](#); and
- I am authorised to submit this form to BMJ on behalf of all existing authors (including each author named in Part B).

Signed  
(Corresponding Author):

Print name:

Dr. Chantale Bernatchez

Date:

12/3/2021

*Completed forms should be sent to the Journal Editorial Office who will contact the Corresponding Author in due course to confirm whether the changes requested have been accepted or rejected.*

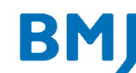

**CONTINUATION SHEET: PART C: Proposed authorship changes**

| Author Full Name        | Author Affiliation            | Author Contact Email Address |
|-------------------------|-------------------------------|------------------------------|
| Yan Long                | The University of Texas MDACC | ylong@mdanderson.org         |
| Junya Fujimoto          | The University of Texas MDACC | jfujimoto@mdanderson.org     |
| Shiaw-Yih Lin           | The University of Texas MDACC | sylin@mdanderson.org         |
| Anirban Maitra          | The University of Texas MDACC | amaitra@mdanderson.org       |
| Marcelo Vailati Negroao | The University of Texas MDACC | mvnegrao@mdanderson.org      |
| Kyle G Mitchell         | The University of Texas MDACC | kyle.g.mitchell@uth.tmc.edu  |
| Annikka Weissferdt      | The University of Texas MDACC | aweissferdt@mdanderson.org   |
| Ara A. Vaporciyan       | The University of Texas MDACC | avaporci@mdanderson.org      |
| Tina Cascone            | The University of Texas MDACC | tcascone@mdanderson.org      |
| Jack A Roth             | The University of Texas MDACC | jroth@mdanderson.org         |
| Jianjun Zhang           | The University of Texas MDACC | jzhang20@mdanderson.org      |
| Boris Sepesi            | The University of Texas MDACC | bsepesi@mdanderson.org       |
| Don Gibbons             | The University of Texas MDACC | dlgibbon@mdanderson.org      |
| John V Heymach          | The University of Texas MDACC | jheymach@mdanderson.org      |
| Cara Haymaker           | The University of Texas MDACC | chaymaker@mdanderson.org     |
| Daniel McGrail          | The University of Texas MDACC | djm McGrail@mdanderson.org   |
| Alexandre Reuben        | The University of Texas MDACC | areuben@mdanderson.org       |
| Chantale Bernatchez     | The University of Texas MDACC | cbernatchez@mdanderson.org   |
|                         |                               |                              |
|                         |                               |                              |
|                         |                               |                              |
|                         |                               |                              |
|                         |                               |                              |

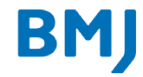**CONTINUATION SHEET: PART C: Competing interest(s) change**

| Author Full Name | Competing Interest(s) |
|------------------|-----------------------|
|                  |                       |
|                  |                       |
|                  |                       |
|                  |                       |
|                  |                       |
|                  |                       |
|                  |                       |
|                  |                       |
|                  |                       |
|                  |                       |
|                  |                       |
|                  |                       |
|                  |                       |
|                  |                       |
|                  |                       |
|                  |                       |
|                  |                       |
|                  |                       |
|                  |                       |
|                  |                       |
|                  |                       |
|                  |                       |
